# Supplementary material for: Sources and processes sustaining surface CO 2 and CH 4 fluxes in a tropical reservoir: the importance of water column metabolism
Source: Copernicus journal article supplement (doi:10.5194/bg-2020-258), 2020-09-14
Supplement: Supplementary file 1 [file bg-2020-258-supplement.pdf]

## Supplementary information

**Table S1:** non-parametric Kendall correlation (cor) and their p-value between reservoir surface CO<sub>2</sub> and CH<sub>4</sub> concentrations with physical and chemical variables.

| Variables         | [CO <sub>2</sub> ] |         | [CH <sub>4</sub> ] |         | n   |
|-------------------|--------------------|---------|--------------------|---------|-----|
|                   | cor                | p-value | cor                | p-value |     |
| Water temperature | -0.36              | < 0.001 | 0.07               | 0.223   | 131 |
| % O <sub>2</sub>  | -0.01              | 0.933   | 0.15               | 0.013   | 130 |
| Chla              | 0.12               | 0.056   | 0.18               | 0.005   | 110 |
| DOC               | 0.01               | 0.939   | 0.17               | 0.008   | 113 |
| TP                | 0.14               | 0.031   | 0.13               | 0.049   | 112 |
| TN                | 0.1                | 0.112   | 0.27               | < 0.001 | 113 |

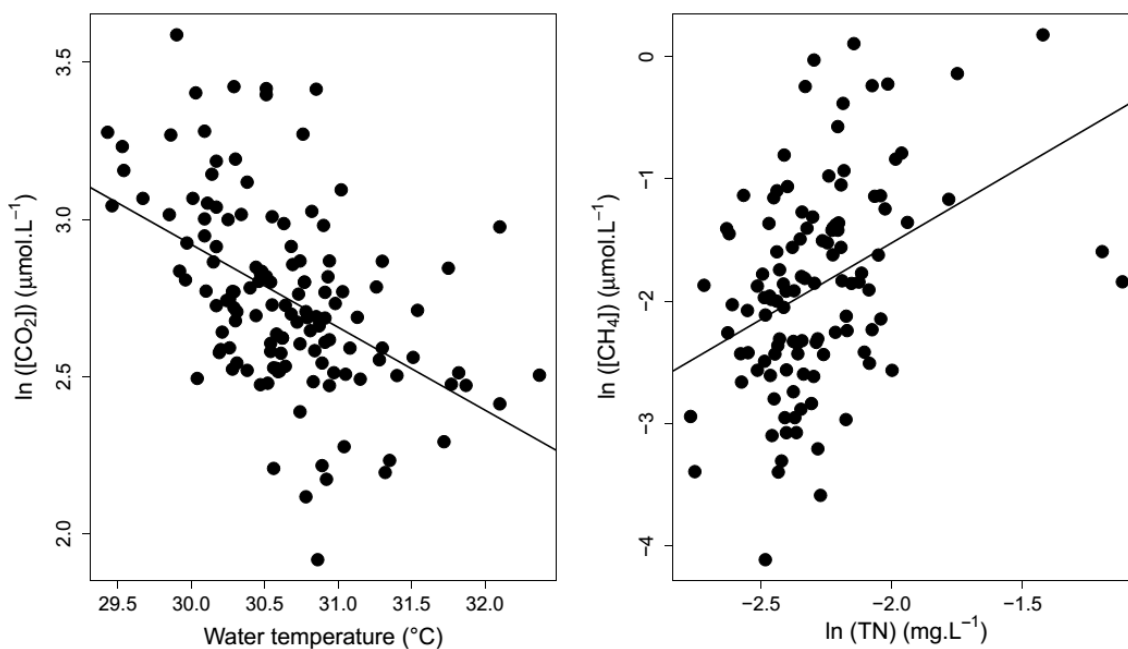

**Figure S1:** Linear regressions of natural logarithm of surface CO<sub>2</sub> and CH<sub>4</sub> concentrations with water temperature (left panel, p-value < 0.001, R<sup>2</sup><sub>adj</sub> = 0.22) and TN (right panel, p-value < 0.001, R<sup>2</sup><sub>adj</sub> = 0.14) respectively in the reservoir (branches and main basin).

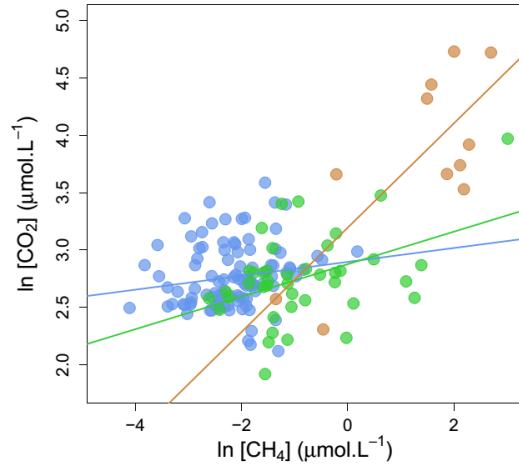

**Figure S2:** Linear regressions of natural logarithm of surface concentrations of CO<sub>2</sub> versus CH<sub>4</sub> in the reservoir inflows (brown, p-value = 0.006 and R<sup>2</sup><sub>adj</sub> = 0.54), branches (green, p-value = 0.005 and R<sup>2</sup><sub>adj</sub> = .017), and main basin (blue, p-value = 0.11 and R<sup>2</sup><sub>adj</sub> = 0.01).

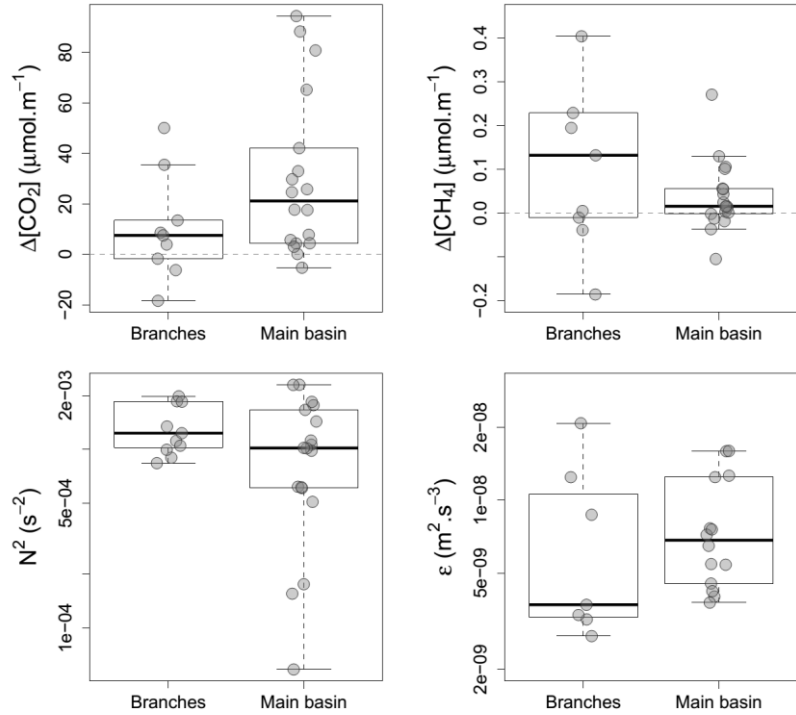

**Figure S3:** boxplots of the buoyancy frequency ( $N^2$ , bottom left panel), dissipation rate ( $\epsilon$ , bottom right panel), and CH<sub>4</sub> and CO<sub>2</sub> concentration gradients at the epilimnion-metalimnion interface (top panels) at epilimnion-metalimnion interface in the reservoir branches and main basin. Boxes bounds, whiskers, solid lines, and open circles represent the 25th and 75th percentiles, the 10th and 90th percentiles, the median, and single data points respectively.

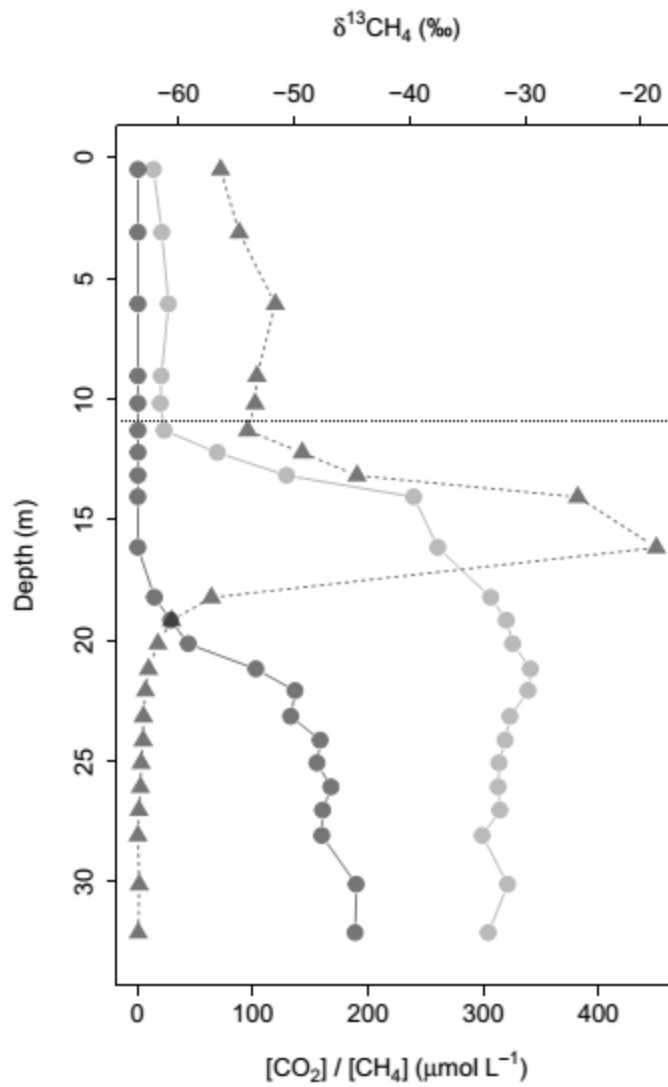

**Figure S4:** Example of a vertical profile (main reservoir, Aug 2018) of CO<sub>2</sub> (light gray points) and CH<sub>4</sub> (dark gray points) concentrations, as well as δ<sup>13</sup>CH<sub>4</sub> (dark grey triangles) as a function of depth. The dotted line represents the top of the metalimnion.

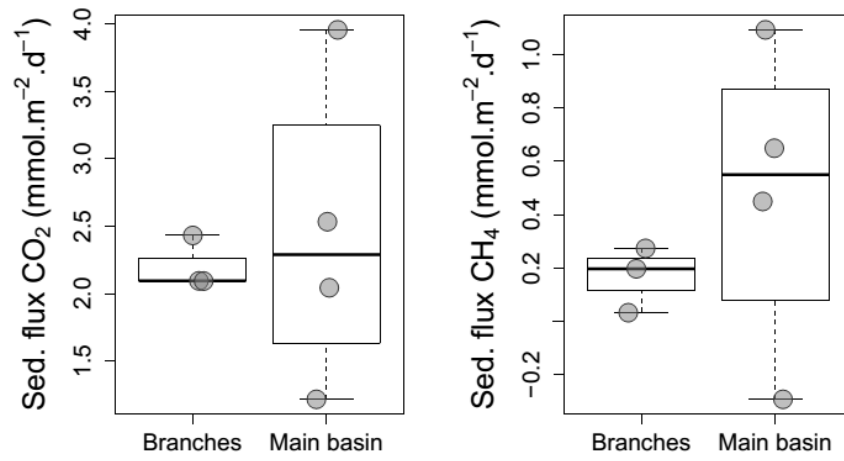

**Figure S5:** Boxplot of sediment CO<sub>2</sub> and CH<sub>4</sub> flux rates (per sediment area) across sampled sites in the reservoir branches and main basin. Boxes bounds, whiskers, solid lines, and open circles represent the 25th and 75th percentiles, the 10th and 90th percentiles, the median, and single data points respectively.

**Table S2:** Estimated averages ( $\pm$  SE) of rates of CO<sub>2</sub> inputs to the epilimnion from horizontal flow (H), sediments (S), vertical transport (V), and internal metabolism (M\_inc and M\_mod when derived from incubations and inverse O<sub>2</sub> modeling respectively), their sum (T, considering an average of M\_inc and M\_mdod) and surface flux to the atmosphere (F) in the branches and main basin for each sampling campaign and their mean. Units are mmol.m<sup>-2</sup>.d<sup>-1</sup> of water surface area. \*Represents missing value, assumed to be equal to the mean of other campaigns.

|            |              | H                | S                 | V                | M_inc             | M_mod               | T                   | F                |
|------------|--------------|------------------|-------------------|------------------|-------------------|---------------------|---------------------|------------------|
| Branches   | Nov-Dec 2016 | 5.7 ( $\pm$ 2.6) | 0.6 ( $\pm$ 0)*   | -1.8 ( $\pm$ NA) | 1.4 ( $\pm$ 1.9)  | -63.2 ( $\pm$ NA)   | -26.5 ( $\pm$ 36.1) | 2.8              |
|            | Apr-May 2017 | 2.7 ( $\pm$ 0.2) | 0.6 ( $\pm$ 0)*   | 3.6 ( $\pm$ 2.3) | 1.4 ( $\pm$ 1.9)* | -32.4 ( $\pm$ 20)   | -8.6 ( $\pm$ 19.4)  | 15.2             |
|            | Feb-Mar 2018 | 3.2 ( $\pm$ 1.1) | 0.6 ( $\pm$ 0)*   | 0.9 ( $\pm$ 0.5) | 1.4 ( $\pm$ 1.9)* | -47.8 ( $\pm$ 20)*  | -18.6 ( $\pm$ 26.2) | 4.1              |
|            | Aug 2018     | 5.5 ( $\pm$ 3.3) | 0.6 ( $\pm$ 0)*   | 0.1 ( $\pm$ 0.5) | 1.4 ( $\pm$ 1.9)* | -47.8 ( $\pm$ 20)*  | -17.1 ( $\pm$ 28.4) | -3.4             |
|            | Mean         | 4.3 ( $\pm$ 0.8) | 0.6 ( $\pm$ 0)    | 0.7 ( $\pm$ 1.1) | 1.4 ( $\pm$ 1.9)  | -47.8 ( $\pm$ 15.4) | -17.7 ( $\pm$ 26.5) | 4.7 ( $\pm$ 3.9) |
| Main basin | Nov-Dec 2016 | 0.2 ( $\pm$ NA)  | 0.5 ( $\pm$ 0.1)* | 6 ( $\pm$ 2.2)   | -2.6 ( $\pm$ 6.2) | -21.4 ( $\pm$ 5.6)  | -5.3 ( $\pm$ 11.7)  | 11.3             |
|            | Apr-May 2017 | 0.4 ( $\pm$ NA)  | 0.5 ( $\pm$ 0.1)* | 3.1 ( $\pm$ 1.3) | 7.2 ( $\pm$ NA)   | -49 ( $\pm$ 37.3)   | -16.9 ( $\pm$ 29.5) | 15.1             |
|            | Feb-Mar 2018 | 0.5 ( $\pm$ NA)  | 0.5 ( $\pm$ 0.1)* | 4.7 ( $\pm$ 1)   | 2.3 ( $\pm$ 6.2)* | -17 ( $\pm$ 4.5)    | -1.6 ( $\pm$ 10.8)  | 3.3              |
|            | Aug 2018     | 0.1 ( $\pm$ NA)  | 0.5 ( $\pm$ 0.1)* | 4.3 ( $\pm$ 3.3) | 2.3 ( $\pm$ 6.2)* | -16.2 ( $\pm$ 20.9) | -2 ( $\pm$ 12.6)    | 0.3              |
|            | Mean         | 0.3 ( $\pm$ 0.1) | 0.5 ( $\pm$ 0.1)  | 4.5 ( $\pm$ 0.6) | 2.3 ( $\pm$ 4.9)  | -25.9 ( $\pm$ 7.8)  | -6.5 ( $\pm$ 14.9)  | 7.5 ( $\pm$ 3.4) |

**Table S3:** Estimated averages ( $\pm$  SE) of rates of CH<sub>4</sub> inputs to the epilimnion from horizontal flow (H), sediments (S), vertical transport (V), and internal metabolism (M\_inc), their sum (T) and surface flux to the atmosphere (F) in the branches and main basin for each sampling campaign and their mean. Units are mmol.m<sup>-2</sup>.d<sup>-1</sup> of water surface area. \*Represents missing value, assumed to be equal to the mean of other campaigns.

|            |              | H                    | S                   | V                    | M_inc                | T                   | F                  |
|------------|--------------|----------------------|---------------------|----------------------|----------------------|---------------------|--------------------|
| Branches   | Nov-Dec 2016 | 0.94 ( $\pm$ 0.67)   | 0.04 ( $\pm$ 0.02)* | -0.001 ( $\pm$ NA)   | 0.04 ( $\pm$ 0.05)   | 1.03 ( $\pm$ 0.74)  | 1.28               |
|            | Apr-May 2017 | 0.58 ( $\pm$ 0.08)   | 0.04 ( $\pm$ 0.02)* | 0.001 ( $\pm$ 0.008) | 0.04 ( $\pm$ 0.05)*  | 0.67 ( $\pm$ 0.16)  | 0.71               |
|            | Feb-Mar 2018 | 0.16 ( $\pm$ 0.08)   | 0.04 ( $\pm$ 0.02)* | 0.025 ( $\pm$ 0.016) | 0.04 ( $\pm$ 0.05)*  | 0.27 ( $\pm$ 0.17)  | 0.84               |
|            | Aug 2018     | 1.97 ( $\pm$ 1.39)   | 0.04 ( $\pm$ 0.02)* | 0.034 ( $\pm$ 0.029) | 0.04 ( $\pm$ 0.05)*  | 2.09 ( $\pm$ 1.49)  | 1.13               |
|            | Mean         | 0.91 ( $\pm$ 0.39)   | 0.04 ( $\pm$ 0.02)  | 0.015 ( $\pm$ 0.009) | 0.04 ( $\pm$ 0.05)   | 1.01 ( $\pm$ 0.46)  | 0.99 ( $\pm$ 0.13) |
| Main basin | Nov-Dec 2016 | 0.005 ( $\pm$ NA)    | 0.1 ( $\pm$ 0.06)*  | 0.001 ( $\pm$ 0.004) | -0.35 ( $\pm$ 0.32)  | -0.24 ( $\pm$ 0.38) | 0.36               |
|            | Apr-May 2017 | 0.003 ( $\pm$ NA)    | 0.1 ( $\pm$ 0.06)*  | 0.013 ( $\pm$ 0.008) | 0.03 ( $\pm$ NA)     | 0.14 ( $\pm$ 0.39)  | 0.39               |
|            | Feb-Mar 2018 | 0.003 ( $\pm$ NA)    | 0.1 ( $\pm$ 0.06)*  | 0.001 ( $\pm$ 0.003) | -0.16 ( $\pm$ 0.32)* | -0.06 ( $\pm$ 0.38) | 0.45               |
|            | Aug 2018     | 0.003 ( $\pm$ NA)    | 0.1 ( $\pm$ 0.06)*  | 0.018 ( $\pm$ 0.008) | -0.16 ( $\pm$ 0.32)* | -0.04 ( $\pm$ 0.39) | 0.58               |
|            | Mean         | 0.004 ( $\pm$ 0.001) | 0.1 ( $\pm$ 0.06)   | 0.008 ( $\pm$ 0.004) | -0.16 ( $\pm$ 0.19)  | -0.05 ( $\pm$ 0.25) | 0.44 ( $\pm$ 0.05) |
